# Supplementary material for: Reynoutria Rhizomes as a Natural Source of SARS-CoV-2 Mpro Inhibitors–Molecular Docking and In Vitro Study
Source: MDPI journal article supplement (doi:10.3390/ph14080742), 2021-07-29
Supplement: s1 [file s1]

## SUPPLEMENTARY MATERIAL

### *Reynoutria* rhizomes as a natural source of SARS-CoV-2 Mpro inhibitors - molecular docking and *in vitro* study.

Izabela Nawrot-Hadzik, Mikołaj Żmudziński, Adam Matkowski, Robert Preissner, Małgorzata Kęsik-Brodacka, Jakub Hadzik, Marcin Dąg, Renata Abel

resveratrol  
CID: 71528811

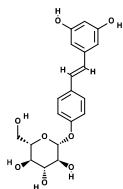

emodin  
CID: 3220

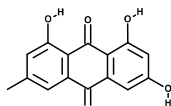

vanicoside B  
CID: 10033855

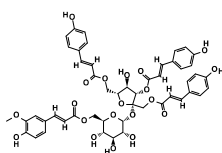

tatariside B  
CID: 102450498

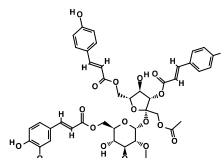

procyanidin B2 3'-O-gallate  
CID: 15593124

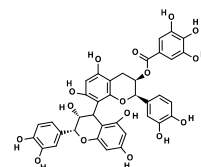

piceatannol  
CID: 667639

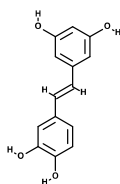

emodin 8-glucoside  
CID: 99649

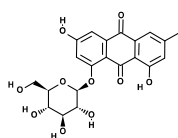

vanicoside C  
CID: 10724147

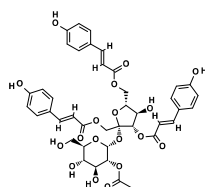

Epicatechin  
CID: 72276

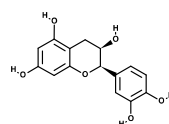

procyanidin B2 3,3'-di-O-gallate  
CID: 124016

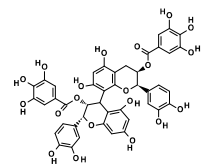

piceatannol glucoside  
CID: 131752959

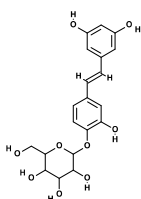

emodin bianthrone  
CID: 10097848

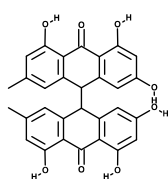

hydropiperoside  
CID: 10350284

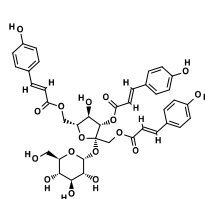

epicatechin gallate  
CID: 107905

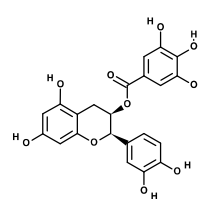

procyanidin C1  
CID: 169853

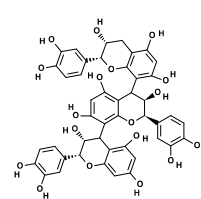

piceid  
CID: 5281718

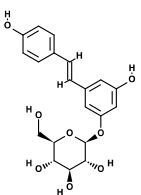

physcion  
CID: 10639

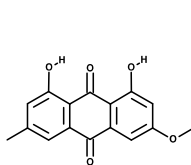

lapathoside A  
CID: 10011201

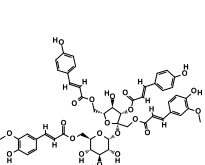

epigallocatechin gallate  
CID: 65064

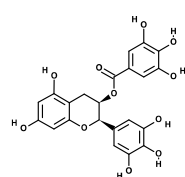

procyanidin C1 3',3''-di-O-gallate  
CID: 73822578

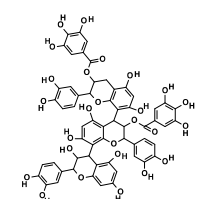

resveratrol  
CID: 445154

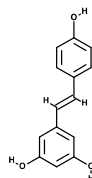

vanicoside A  
CID: 6449878

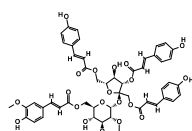

lapathoside C  
CID: 11061786

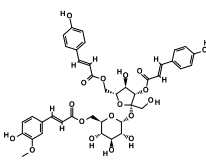

procyanidin B2  
CID: 122738

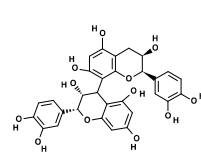

cinnamtannin A2  
CID: 16130899

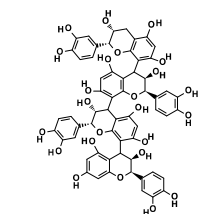

**Supplementary Figure S1.** Structures of compounds docked into the binding site of SARS-CoV-2 main protease, generated with PubChem Sketcher V2.4 (PubChem Sketcher V2.4).

Supplementary Table S1. Compounds docked to SARS-CoV-2 main protease of (Mpro).

| Compound name                          |                       | 2D interaction diagram                                                               |
|----------------------------------------|-----------------------|--------------------------------------------------------------------------------------|
| <i>Reynoutria japonica</i>   stilbenes |                       |                                                                                      |
| 1                                      | Resveratrololide      | 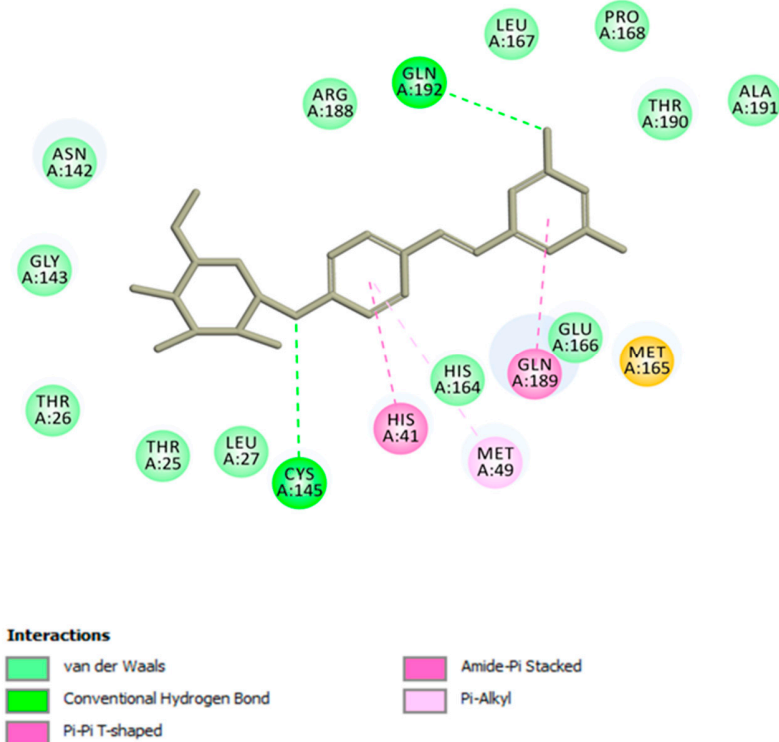  |
| 2                                      | Piceatannol glucoside |  |

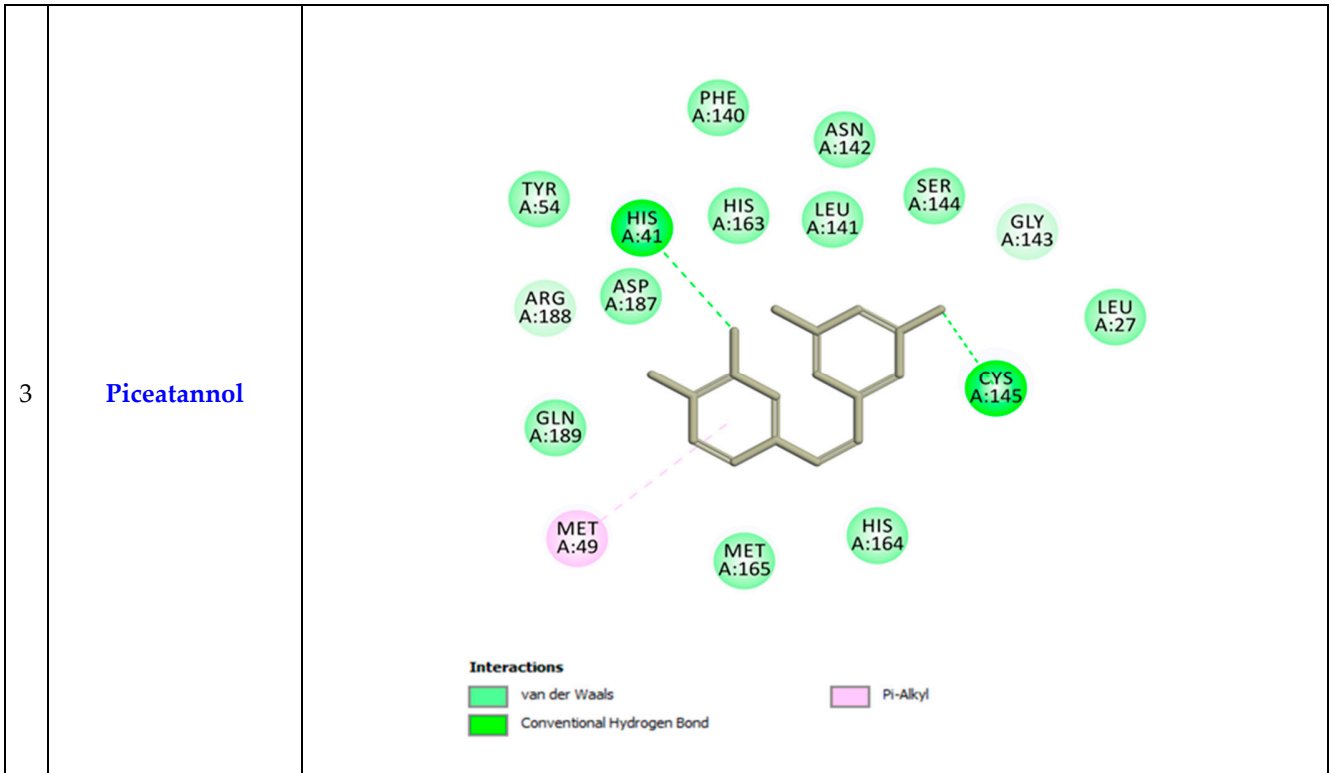

*R.japonica* and *R.sachalinensis* | procyanidins

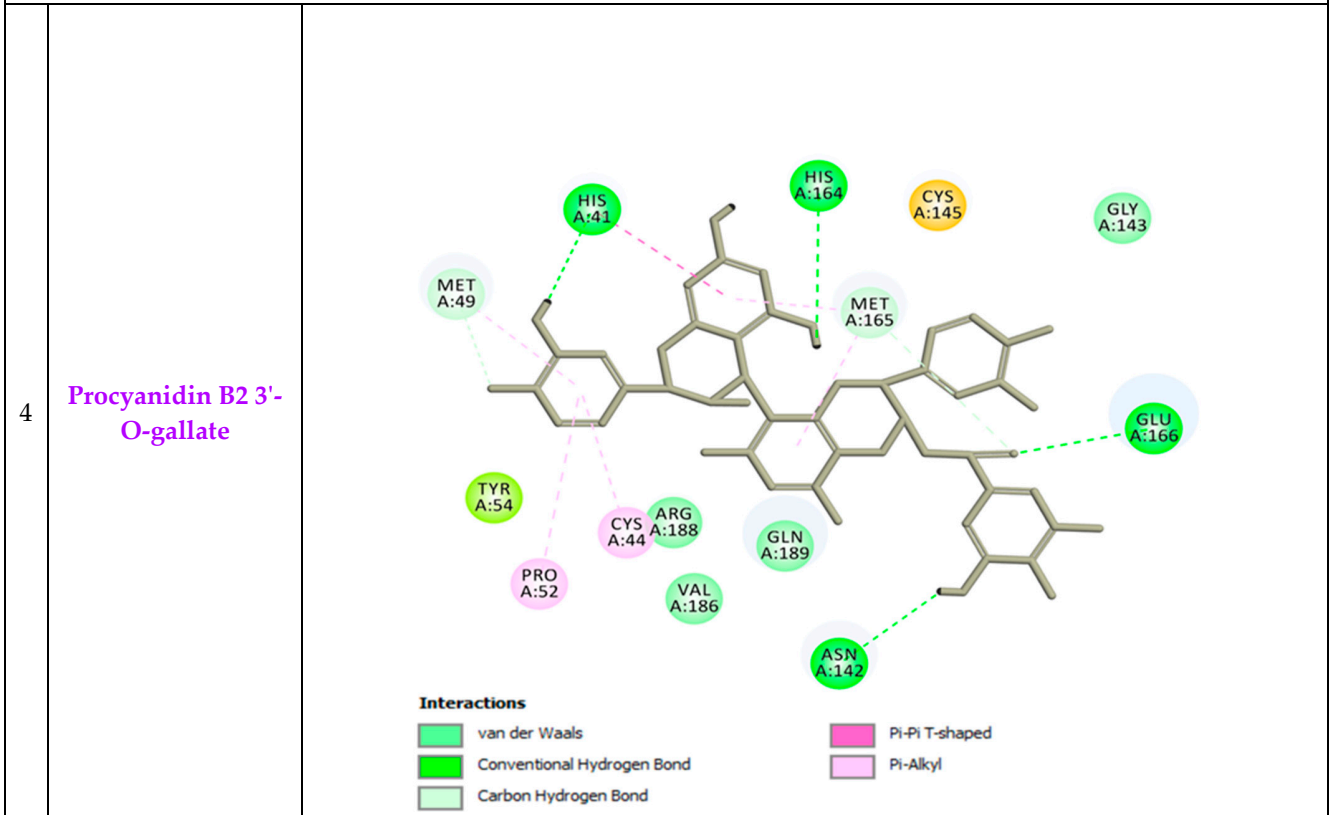

|                                                                      |                                              |                                                                                                                                                                                                                                                                                                                                                                                                                                                                                                                                                                                                                                                                                                                                                                                                                                                                                                       |
|----------------------------------------------------------------------|----------------------------------------------|-------------------------------------------------------------------------------------------------------------------------------------------------------------------------------------------------------------------------------------------------------------------------------------------------------------------------------------------------------------------------------------------------------------------------------------------------------------------------------------------------------------------------------------------------------------------------------------------------------------------------------------------------------------------------------------------------------------------------------------------------------------------------------------------------------------------------------------------------------------------------------------------------------|
| 5                                                                    | <p>Procyanidin C1<br/>3',3"-di-O-gallate</p> | 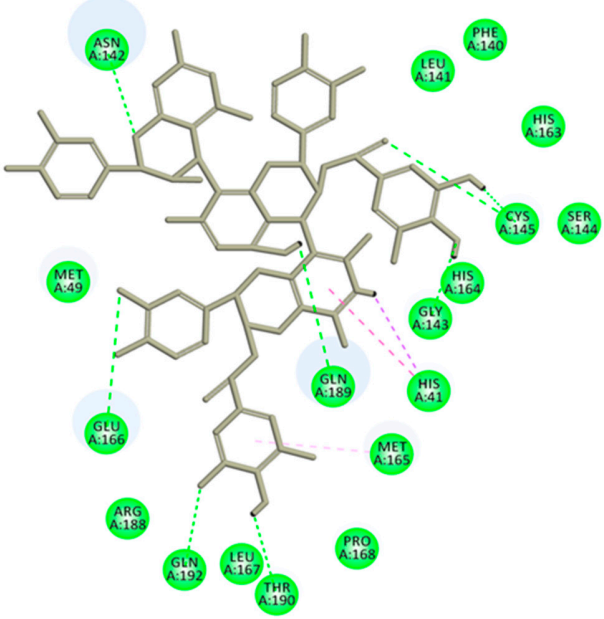 <p><b>Interactions</b></p> <ul style="list-style-type: none"> <li>van der Waals</li> <li>Conventional Hydrogen Bond</li> <li>Pi-Sigma</li> <li>Pi-Pi T-shaped</li> <li>Pi-Alkyl</li> </ul> |
| 6                                                                    | <p>Cinnamtannin A2</p>                       |  <p><b>Interactions</b></p> <ul style="list-style-type: none"> <li>van der Waals</li> <li>Conventional Hydrogen Bond</li> <li>Pi-Pi Stacked</li> <li>Pi-Alkyl</li> </ul>                                                                                                                                                                                                                                                                                                                                                                                                                                                                                                                                                                                                                                          |
| <p><i>R.japonica</i> and <i>R.sachalinensis</i>   anthraquinones</p> |                                              |                                                                                                                                                                                                                                                                                                                                                                                                                                                                                                                                                                                                                                                                                                                                                                                                                                                                                                       |

|   |                   |                                                                                                                                                                                                                                                                              |
|---|-------------------|------------------------------------------------------------------------------------------------------------------------------------------------------------------------------------------------------------------------------------------------------------------------------|
| 7 | Physcion          | 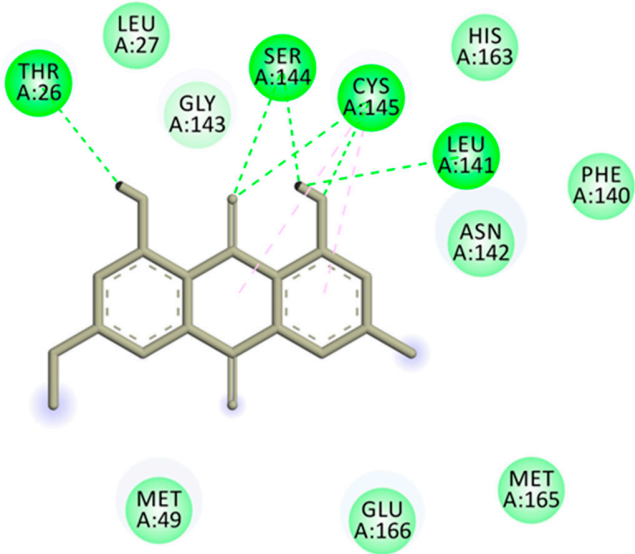 <p><b>Interactions</b></p> <ul style="list-style-type: none"> <li>van der Waals</li> <li>Conventional Hydrogen Bond</li> <li>Pi-Alkyl</li> </ul>                                          |
| 8 | Emodin bianthrone |  <p><b>Interactions</b></p> <ul style="list-style-type: none"> <li>van der Waals</li> <li>Conventional Hydrogen Bond</li> <li>Pi-Pi T-shaped</li> <li>Alkyl</li> <li>Pi-Alkyl</li> </ul> |

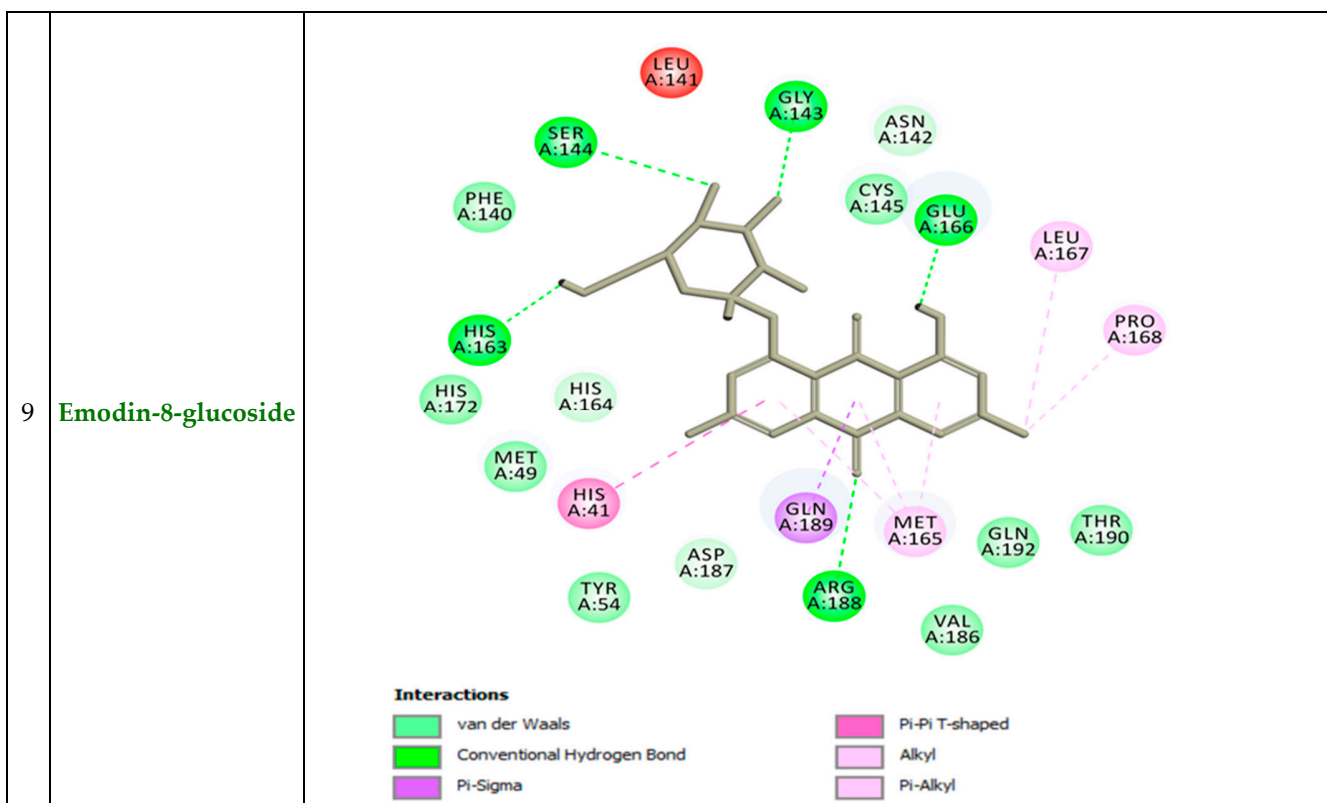

Mainly *R. sachalinensis* | Phenylpropanoid Disaccharide Esters

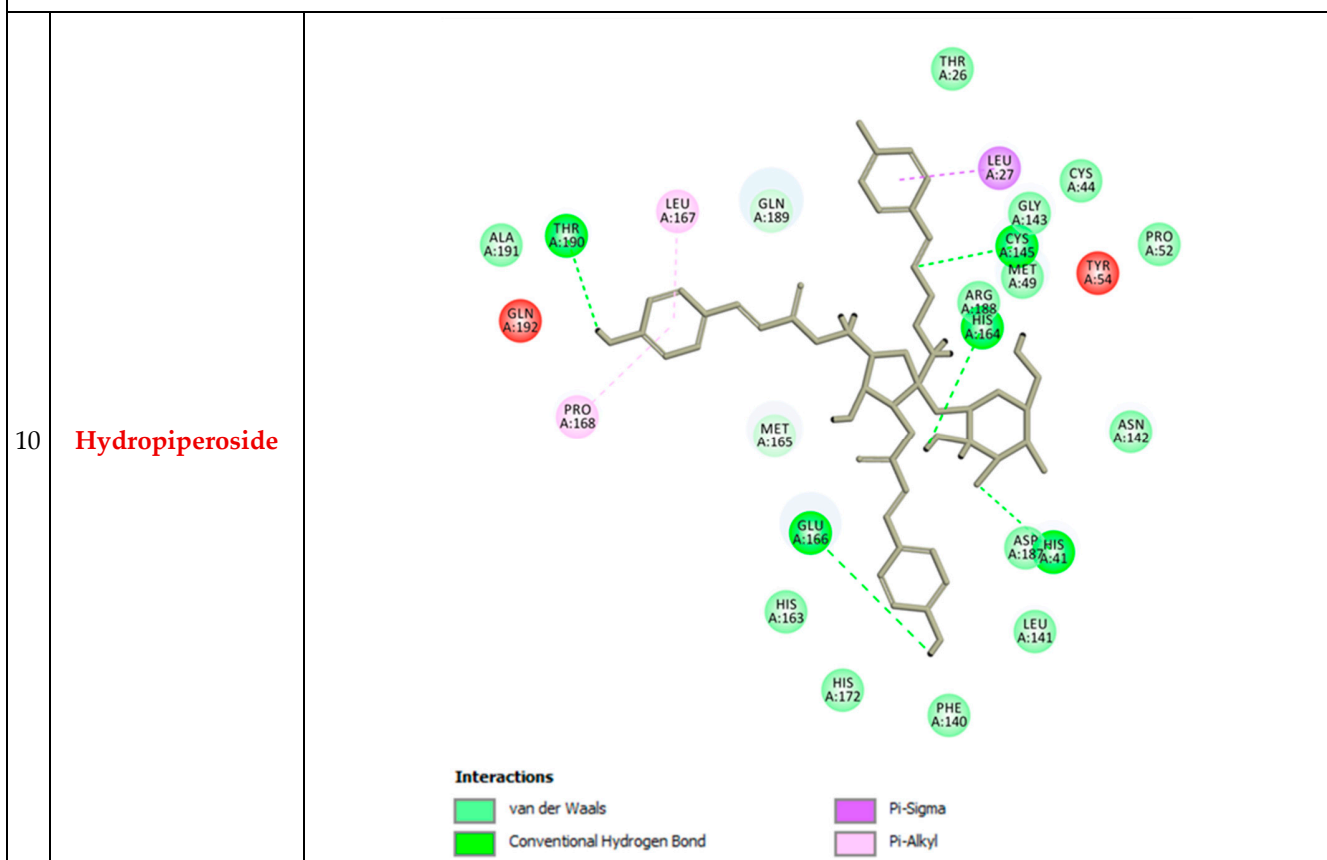

|    |               |                                                                                                                                                                                                                                                    |
|----|---------------|----------------------------------------------------------------------------------------------------------------------------------------------------------------------------------------------------------------------------------------------------|
| 11 | Lapathoside A | 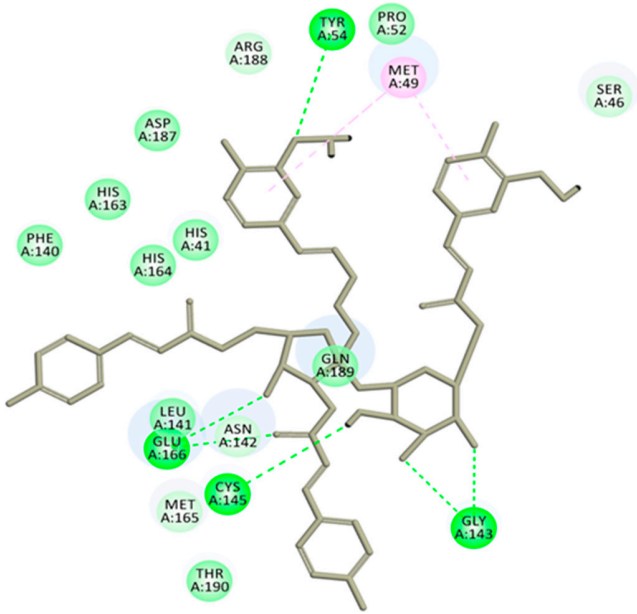 <p><b>Interactions</b></p> <ul style="list-style-type: none"> <li>van der Waals</li> <li>Conventional Hydrogen Bond</li> <li>Alkyl</li> <li>Pi-Alkyl</li> </ul> |
| 12 | Tatariside B  |  <p><b>Interactions</b></p> <ul style="list-style-type: none"> <li>van der Waals</li> <li>Conventional Hydrogen Bond</li> <li>Pi-Alkyl</li> </ul>              |

|    |               |                                                                                                                                                                                                                                                                                                |
|----|---------------|------------------------------------------------------------------------------------------------------------------------------------------------------------------------------------------------------------------------------------------------------------------------------------------------|
| 13 | Vanicoside C  | 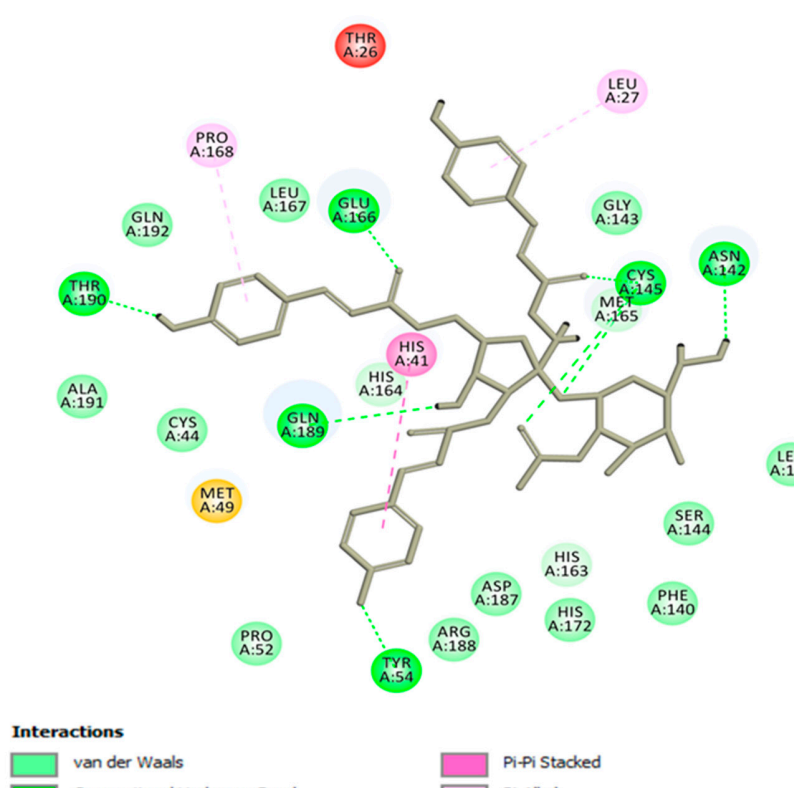 <p><b>Interactions</b></p> <ul style="list-style-type: none"> <li>van der Waals</li> <li>Conventional Hydrogen Bond</li> <li>Pi-Pi Stacked</li> <li>Pi-Alkyl</li> </ul>                                    |
| 14 | Lapathoside C |  <p><b>Interactions</b></p> <ul style="list-style-type: none"> <li>van der Waals</li> <li>Conventional Hydrogen Bond</li> <li>Pi-Sigma</li> <li>Pi-Pi T-shaped</li> <li>Alkyl</li> <li>Pi-Alkyl</li> </ul> |



**Supplementary Table S2. GOLD docking scores of all compounds tested in vitro.**

| Ligand name                       | Goldscore.Fitness | Goldscore.External.HBond | Goldscore.External.Vdw | Goldscore.Internal.HBond | Goldscore.Internal.Torsion | Goldscore.Internal.Vdw |
|-----------------------------------|-------------------|--------------------------|------------------------|--------------------------|----------------------------|------------------------|
| N3                                | 86.5557           | 4.7025                   | 62.1031                | 0.0000                   | -36.2638                   | -337.6012              |
| <i>in vitro</i> tested            |                   |                          |                        |                          |                            |                        |
| Vanicoside A                      | 115.7695          | 0.7297                   | 84.8721                | 0.0000                   | -95.3087                   | -2322.0438             |
| Vanicoside B                      | 129.6954          | 3.4584                   | 92.7738                | 0.0000                   | -89.6407                   | -2184.0755             |
| Emodin                            | 92.9682           | 2.0399                   | 69.8483                | 0.0000                   | -92.4773                   | -2324.0449             |
| Procyanidin B2 3,3'-di-O-gallate  | 99.5746           | 1.0515                   | 83.7998                | 0.0000                   | -48.7760                   | -1436.3108             |
| Procyanidin C1                    | 103.3066          | 2.6481                   | 78.1660                | 0.0000                   | -26.5339                   | -1583.1373             |
| Resveratrol                       | 48.7919           | 5.5779                   | 31.6672                | 0.0000                   | -5.9684                    | -4.2557                |
| Piceid                            | 68.7376           | 5.1522                   | 46.8220                | 0.0000                   | -9.8268                    | -6.9843                |
| (-)-Epigallocatechin gallate      | 71.1295           | 5.5336                   | 49.3404                | 0.0000                   | -10.0207                   | -7.3450                |
| Epicatechin                       | 69.4952           | 3.2339                   | 50.2172                | 0.0000                   | -7.6040                    | -6.6429                |
| Epicatechin gallate               | 56.0065           | 3.9760                   | 39.8699                | 0.0000                   | -57.7864                   | -2294.9008             |
| Procyanidin B2                    | 85.8317           | 3.2692                   | 65.2979                | 0.0000                   | -19.4849                   | -1005.2852             |
| not tested <i>in vitro</i>        |                   |                          |                        |                          |                            |                        |
| Resveratrolside                   | 52.7316           | 0.0000                   | 39.7201                | 0.0000                   | -11.6108                   | -4.2389                |
| Piceatannol glucoside             | 50.8886           | 0.8703                   | 37.1399                | 0.0000                   | -12.8567                   | -5.1795                |
| Piceatannol                       | 40.3628           | 6.0000                   | 25.6313                | 0.0000                   | -0.2520                    | -0.1850                |
| Procyanidin B2 3'-O-gallate       | 78.3216           | 0.3099                   | 67.9252                | 0.0000                   | -32.7348                   | -1161.8064             |
| Procyanidin C1 3',3"-di-O-gallate | 82.6413           | 1.6844                   | 72.6499                | 0.0000                   | -59.0013                   | -2328.1308             |
| Cinnamtannin A2                   | 103.2133          | 0.5067                   | 78.6915                | 0.0000                   | -36.7637                   | -2137.3809             |
| Physcion                          | 70.1055           | 4.0930                   | 51.3237                | 0.0000                   | -9.1274                    | -6.5047                |
| Emodin bianthrone                 | 54.8997           | 0.1714                   | 42.4375                | 0.0000                   | -11.1523                   | -0.1254                |
| Emodin-8-glucoside                | 69.4952           | 3.2339                   | 50.2172                | 0.0000                   | -7.6040                    | -6.6429                |
| Hydropiperoside                   | 111.3499          | 2.6981                   | 91.0385                | 0.0000                   | -72.5777                   | -1814.3937             |
| Lapathoside A                     | 75.8767           | 0.5704                   | 63.9491                | 0.0000                   | -90.7232                   | -2352.9685             |
| Tatariside B                      | 86.0933           | 3.6217                   | 61.5218                | 0.0000                   | -84.1370                   | -2293.6888             |
| Vanicoside C                      | 95.2201           | 1.6549                   | 94.6805                | 0.0000                   | -72.4706                   | -1985.4662             |
| Lapathoside C                     | 105.5444          | 2.4506                   | 76.7571                | 0.0000                   | -76.2612                   | -1989.8717             |

**Supplementary Table S3.** Compounds studied in vitro against the proteases SARS-CoV-2 Mpro.

| No. | Compound                         | Molecular weight<br>g/mol | Inhibitor concentration<br>μM | Amount used in the test*<br>μg | SARS-CoV-2 Mpro residual activity [% ± S.D.] |
|-----|----------------------------------|---------------------------|-------------------------------|--------------------------------|----------------------------------------------|
| 1   | Vanicoside A                     | 998.9                     | 100                           | 9.99                           | 29.3 ± 2.9                                   |
| 2   | Vanicoside B                     | 956.9                     | 100                           | 9.57                           | 36.2 ± 2.2                                   |
| 3   | Resveratrol                      | 228.24                    | 100                           | 2.28                           | 87.5 ± 0.8                                   |
| 4   | Piceid                           | 390.4                     | 100                           | 3.90                           | 91.6 ± 0.5                                   |
| 5   | Emodin                           | 270.24                    | 100                           | 2.70                           | 48.5 ± 0.5                                   |
| 6   | Epicatechin                      | 290.27                    | 100                           | 2.90                           | 103.0 ± 3.3                                  |
| 7   | Epicatechin gallate              | 442.4                     | 100                           | 4.42                           | 100.7 ± 3.8                                  |
| 8   | Epigallocatechin gallate         | 458.4                     | 100                           | 4.58                           | 89.3 ± 4.6                                   |
| 9   | Procyanidin B2                   | 578.5                     | 100                           | 5.79                           | 86.1 ± 1.6                                   |
| 10  | Procyanidin C1                   | 866.8                     | 100                           | 8.67                           | 77.7 ± 7.4                                   |
| 11  | Procyanidin B2 3,3'-di-O-gallate | 882.7                     | 100                           | 8.83                           | 63.3 ± 3.2                                   |

\* the amount of the compound added to the reaction mixture; for easier comparison with the extracts and fractions. S.D – standard deviation

**Supplementary Table S4.** Extracts and fractions studied in vitro against the proteases SARS-CoV-2 Mpro.

| No. | Extract/fraction                        | Inhibitor<br>concentration | Amount used<br>in test* | SARS-CoV-2 Mpro<br>residual activity [% $\pm$<br>S.D.] |
|-----|-----------------------------------------|----------------------------|-------------------------|--------------------------------------------------------|
|     |                                         | $\mu\text{g/ml}$           | $\mu\text{g}$           |                                                        |
| 12  | <i>R. japonica</i> acetone extract      | 50                         | 5.0                     | $16.4 \pm 1.4$                                         |
| 13  | <i>R. sachalinensis</i> acetone extract | 50                         | 5.0                     | $6.6 \pm 0.6$                                          |
| 14  | <i>R. japonica</i> dichloromethane      | 50                         | 5.0                     | $34.5 \pm 1.2$                                         |
| 15  | <i>R. sachalinensis</i> dichloromethane | 50                         | 5.0                     | $21.6 \pm 0.6$                                         |
| 16  | <i>R. japonica</i> diethyl ether        | 50                         | 5.0                     | $49.0 \pm 1.1$                                         |
| 17  | <i>R. sachalinensis</i> diethyl ether   | 50                         | 5.0                     | $47.6 \pm 0.6$                                         |
| 18  | <i>R. japonica</i> ethyl acetate        | 50                         | 5.0                     | $20.9 \pm 0.4$                                         |
| 19  | <i>R. sachalinensis</i> ethyl acetate   | 50                         | 5.0                     | $38.8 \pm 1.9$                                         |
| 20  | <i>R. japonica</i> butanol              | 50                         | 5.0                     | $9.0 \pm 0.6$                                          |
| 21  | <i>R. sachalinensis</i> butanol         | 50                         | 5.0                     | $2.6 \pm 0.1$                                          |
| 22  | <i>R. japonica</i> water                | 50                         | 5.0                     | $38.1 \pm 1.6$                                         |
| 23  | <i>R. sachalinensis</i> water           | 50                         | 5.0                     | $10.7 \pm 0.6$                                         |

**Supplementary Table S5.** SARS-CoV-2 Mpro activity in serial dilution of isolated compounds. The results were presented as SARS-CoV-2 Mpro residual activity [%].

|                         | <b>1</b>                         | <b>2</b>                         | <b>5</b>                         | <b>10</b>       | <b>11</b>                        |
|-------------------------|----------------------------------|----------------------------------|----------------------------------|-----------------|----------------------------------|
| Concentr.<br>[ $\mu$ M] | Vanicoside A                     | Vanicoside B                     | Emodin                           | Procyanidin C1  | Procyanidin B2 3,3'-di-O-gallate |
| 100                     | 29.3 $\pm$ 2.9                   | 36.2 $\pm$ 2.2                   | <b>48.5 <math>\pm</math> 0.5</b> | 77.7 $\pm$ 7.4  | 63.3 $\pm$ 3.2                   |
| 66.7                    | 35.2 $\pm$ 5.4                   | <b>51.8 <math>\pm</math> 1.5</b> | 72.5 $\pm$ 1.6                   | 131.3 $\pm$ 7.9 | 99.0 $\pm$ 4.3                   |
| 44.4                    | 42.3 $\pm$ 5.8                   | 65.9 $\pm$ 1.6                   | 80.5 $\pm$ 2.6                   | 147.4 $\pm$ 3.7 | 130.7 $\pm$ 7.3                  |
| 29.6                    | <b>52.3 <math>\pm</math> 6.4</b> | 70.8 $\pm$ 7.4                   | 87.5 $\pm$ 4.1                   | 149.6 $\pm$ 7.4 | 148.1 $\pm$ 4.2                  |
| 19.8                    | 73.7 $\pm$ 5.7                   | 97.8 $\pm$ 2.5                   | 99.9 $\pm$ 2.3                   | 169.1 $\pm$ 2.3 | 156.9 $\pm$ 6.7                  |
| 13.2                    | 91.8 $\pm$ 2.7                   | 111.8 $\pm$ 7.9                  | 111.0 $\pm$ 6.4                  | 177.3 $\pm$ 8.3 | 164.9 $\pm$ 4.1                  |
| 8.78                    | 107.0 $\pm$ 1.2                  | 125.8 $\pm$ 1.7                  | 118.6 $\pm$ 4.5                  | 175.9 $\pm$ 5.1 | 162.9 $\pm$ 5.9                  |
| 5.85                    | 111.1 $\pm$ 6.2                  | 133.4 $\pm$ 2.4                  | 132.0 $\pm$ 3.2                  | 175.1 $\pm$ 6.5 | 164.7 $\pm$ 5.2                  |
| 3.90                    | 123.9 $\pm$ 3.2                  | 138.5 $\pm$ 5.4                  | 133.7 $\pm$ 4.2                  | 171.0 $\pm$ 8.3 | 167.5 $\pm$ 3.8                  |

**Supplementary Table S6.** SARS-CoV-2 Mpro activity in serial dilution of extracts and fractions from *R. japonica* (R.j.) and *R. sachalinensis* (R.s.) rhizomes. The results were presented as SARS-CoV-2 Mpro residual activity [%].

|                      | 12                     | 13                     | 14                 | 15                 | 16                 | 17                 | 18                | 19                | 20                     | 21                     | 22                   | 23                   |
|----------------------|------------------------|------------------------|--------------------|--------------------|--------------------|--------------------|-------------------|-------------------|------------------------|------------------------|----------------------|----------------------|
| Concentr.<br>[µg/ml] | <i>R.j.</i><br>acetone | <i>R.s.</i><br>acetone | <i>R.j.</i><br>DCM | <i>R.s.</i><br>DCM | <i>R.j.</i><br>DEE | <i>R.s.</i><br>DEE | <i>R.j.</i><br>EA | <i>R.s.</i><br>EA | <i>R.j.</i><br>butanol | <i>R.s.</i><br>butanol | <i>R.j.</i><br>water | <i>R.s.</i><br>water |
| 50.0                 | 16.4 ± 1.4             | 6.6 ± 0.6              | 34.5 ± 1.2         | 21.6 ± 0.6         | 49.0 ± 1.1         | 47.6 ± 0.6         | 20.9 ± 0.4        | 38.8 ± 1.9        | 9.0 ± 0.6              | 2.6 ± 0.1              | 38.1 ± 1.6           | 10.7 ± 0.6           |
| 33.3                 | 26.5 ± 2.5             | 8.4 ± 2.3              | 56.9 ± 2.1         | 41.0 ± 1.4         | 83.4 ± 4.3         | 91.1 ± 7.7         | 49.0 ± 2.6        | 43.2 ± 1.7        | 12.5 ± 0.5             | 6.4 ± 0.2              | 53.9 ± 1.2           | 18.4 ± 0.9           |
| 22.2                 | 41.5 ± 2.8             | 14.8 ± 2.3             | 70.2 ± 4.6         | 55.0 ± 0.8         | 105.5 ± 2.1        | 120.1 ± 3.1        | 81.0 ± 0.5        | 68.9 ± 3.3        | 20.8 ± 1.4             | 9.4 ± 0.8              | 84.4 ± 1.3           | 33.7 ± 0.9           |
| 14.8                 | 65.8 ± 3.0             | 28.8 ± 2.8             | 88.5 ± 5.9         | 67.3 ± 1.7         | 132.5 ± 6.5        | 148.4 ± 2.9        | 102.6 ± 6.3       | 95.5 ± 2.0        | 33.6 ± 1.9             | 19.0 ± 1.1             | 111.7 ± 2.3          | 51.5 ± 1.8           |
| 9.88                 | 87.1 ± 3.2             | 49.4 ± 2.5             | 104.3 ± 1.5        | 95.0 ± 1.5         | 144.6 ± 9.6        | 168.2 ± 4.0        | 130.5 ± 7.1       | 130.9 ± 8.1       | 43.0 ± 0.7             | 31.6 ± 2.0             | 131.3 ± 0.6          | 66.3 ± 0.8           |
| 6.58                 | 105.4 ± 4.2            | 78.3 ± 3.7             | 122.4 ± 1.8        | 128.9 ± 5.5        | 161.3 ± 3.9        | 179.7 ± 6.2        | 146.8 ± 2.2       | 143.2 ± 6.2       | 63.4 ± 1.3             | 42.9 ± 2.6             | 143.4 ± 2.8          | 95.2 ± 5.1           |
| 4.39                 | 117.1 ± 7.2            | 98.4 ± 0.7             | 135.0 ± 3.3        | 154.4 ± 2.0        | 171.0 ± 6.7        | 187.2 ± 4.1        | 158.8 ± 7.0       | 178.7 ± 6.8       | 91.4 ± 8.3             | 60.8 ± 5.8             | 164.4 ± 8.8          | 121.3 ± 4.0          |
| 2.93                 | 123.3 ± 5.7            | 116.9 ± 1.7            | 137.0 ± 9.8        | 174.5 ± 2.1        | 178.5 ± 2.8        | 189.5 ± 1.1        | 168.1 ± 3.7       | 170.6 ± 10.4      | 108.3 ± 4.0            | 89.8 ± 8.0             | 175.1 ± 14.8         | 141.0 ± 2.5          |
| 1.95                 | 123.6 ± 0.4            | 132.2 ± 1.6            | 154.3 ± 11.2       | 183.4 ± 3.6        | 180.1 ± 6.8        | 194.7 ± 1.1        | 173.3 ± 2.6       | 185.4 ± 12.8      | 138.1 ± 2.2            | 112.7 ± 10.8           | 183.7 ± 6.9          | 159.6 ± 4.9          |

DCM-dichloromethane, DEE-diethyl ether, EA-ethyl acetate.

**Supplementary Table S7.** SARS-CoV-2 Mpro activity in serial dilution of isolated compounds. The results were presented as SARS-CoV-2 Mpro inhibition [%].

|                   | <b>1</b>     | <b>2</b>     | <b>5</b> | <b>10</b>      | <b>11</b>                        |
|-------------------|--------------|--------------|----------|----------------|----------------------------------|
| Concentr.<br>[μM] | Vanicoside A | Vanicoside B | Emodin   | Procyanidin C1 | Procyanidin B2 3,3'-di-O-gallate |
| 100               | 70.7         | 63.80        | 51.50    | 22.30          | 36.70                            |
| 66.7              | 64.8         | 48.20        | 27.50    | 0              | 1.00                             |
| 44.4              | 57.7         | 34.10        | 19.50    | 0              | 0                                |
| 29.6              | 47.7         | 29.20        | 12.50    | 0              | 0                                |
| 19.8              | 26.3         | 2.20         | 0.10     | 0              | 0                                |
| 13.2              | 8.2          | 0            | 0        | 0              | 0                                |
| 8.78              | 0            | 0            | 0        | 0              | 0                                |
| 5.85              | 0            | 0            | 0        | 0              | 0                                |
| 3.90              | 0            | 0            | 0        | 0              | 0                                |

**Supplementary Table S8.** SARS-CoV-2 Mpro activity in serial dilution of extracts and fractions from *R. japonica* (R.j.) and *R.sachalinensis* (R.s.) rhizomes. The results were presented as SARS-CoV-2 Mpro inhibition [%].

|                      | 12                     | 13                     | 14                 | 15                 | 16                 | 17                 | 18                | 19                | 20                     | 21                     | 22                   | 23                   |
|----------------------|------------------------|------------------------|--------------------|--------------------|--------------------|--------------------|-------------------|-------------------|------------------------|------------------------|----------------------|----------------------|
| Concentr.<br>[µg/ml] | <i>R.j.</i><br>acetone | <i>R.s.</i><br>acetone | <i>R.j.</i><br>DCM | <i>R.s.</i><br>DCM | <i>R.j.</i><br>DEE | <i>R.s.</i><br>DEE | <i>R.j.</i><br>EA | <i>R.s.</i><br>EA | <i>R.j.</i><br>butanol | <i>R.s.</i><br>butanol | <i>R.j.</i><br>water | <i>R.s.</i><br>water |
| 50                   | 83.6                   | 93.4                   | 65.5               | 78.4               | 51                 | 52.4               | 79.1              | 61.2              | 91                     | 97.4                   | 61.9                 | 89.3                 |
| 33.3                 | 73.5                   | 91.6                   | 43.1               | 59                 | 16.6               | 8.9                | 51                | 56.8              | 87.5                   | 93.6                   | 46.1                 | 81.6                 |
| 22.2                 | 58.5                   | 85.2                   | 29.8               | 45                 | 0                  | 0                  | 19                | 31.1              | 79.2                   | 90.6                   | 15.6                 | 66.3                 |
| 14.8                 | 34.2                   | 71.2                   | 11.5               | 32.7               | 0                  | 0                  | 0                 | 4.5               | 66.4                   | 81                     | 0                    | 48.5                 |
| 9.88                 | 12.9                   | 50.6                   | 0                  | 5                  | 0                  | 0                  | 0                 | 0                 | 57                     | 68.4                   | 0                    | 33.7                 |
| 6.58                 | 0                      | 21.7                   | 0                  | 0                  | 0                  | 0                  | 0                 | 0                 | 36.6                   | 57.1                   | 0                    | 4.8                  |
| 4.39                 | 0                      | 1.6                    | 0                  | 0                  | 0                  | 0                  | 0                 | 0                 | 8.6                    | 39.2                   | 0                    | 0                    |
| 2.93                 | 0                      | 0                      | 0                  | 0                  | 0                  | 0                  | 0                 | 0                 | 0                      | 10.2                   | 0                    | 0                    |
| 1.95                 | 0                      | 0                      | 0                  | 0                  | 0                  | 0                  | 0                 | 0                 | 0                      | 0                      | 0                    | 0                    |

DCM-dichloromethane, DEE-diethyl ether, EA-ethyl acetate.
